# Supplementary material
Source: HighWire-hosted journal article supplement (https://ard.bmj.com/content/79/4/507)

## Supplementary Figure 1 Inhibition of EZH2 in SSc fibroblasts with GSK126 reduces expression of Collagen and SMA

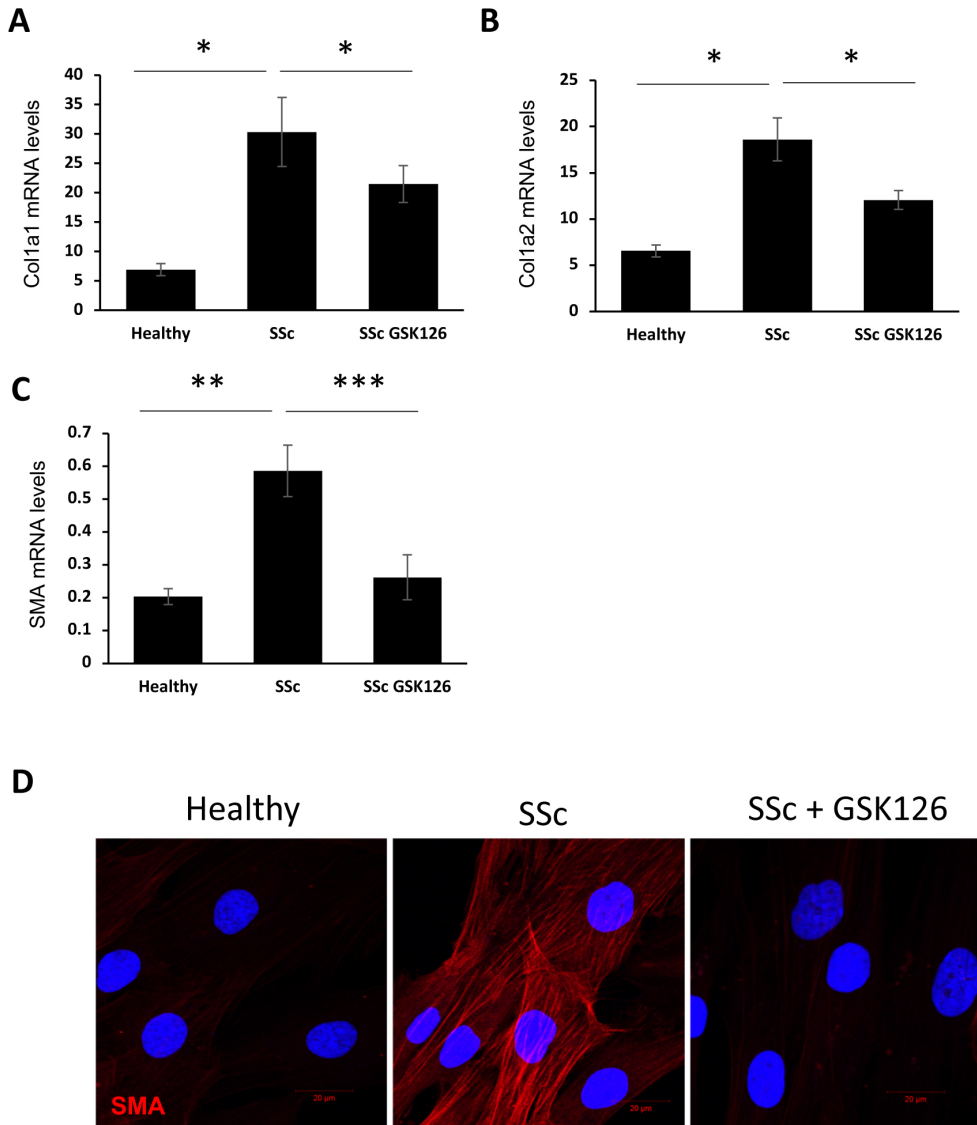

Supplement: inline-supplementary-material-3 [file inline-supplementary-material-3.pdf]
