# Supplementary material
Source: HighWire-hosted journal article supplement (https://ard.bmj.com/content/79/4/507)

## Supplementary Figure 2 HOTAIR induces fibrotic phenotype through Notch 1

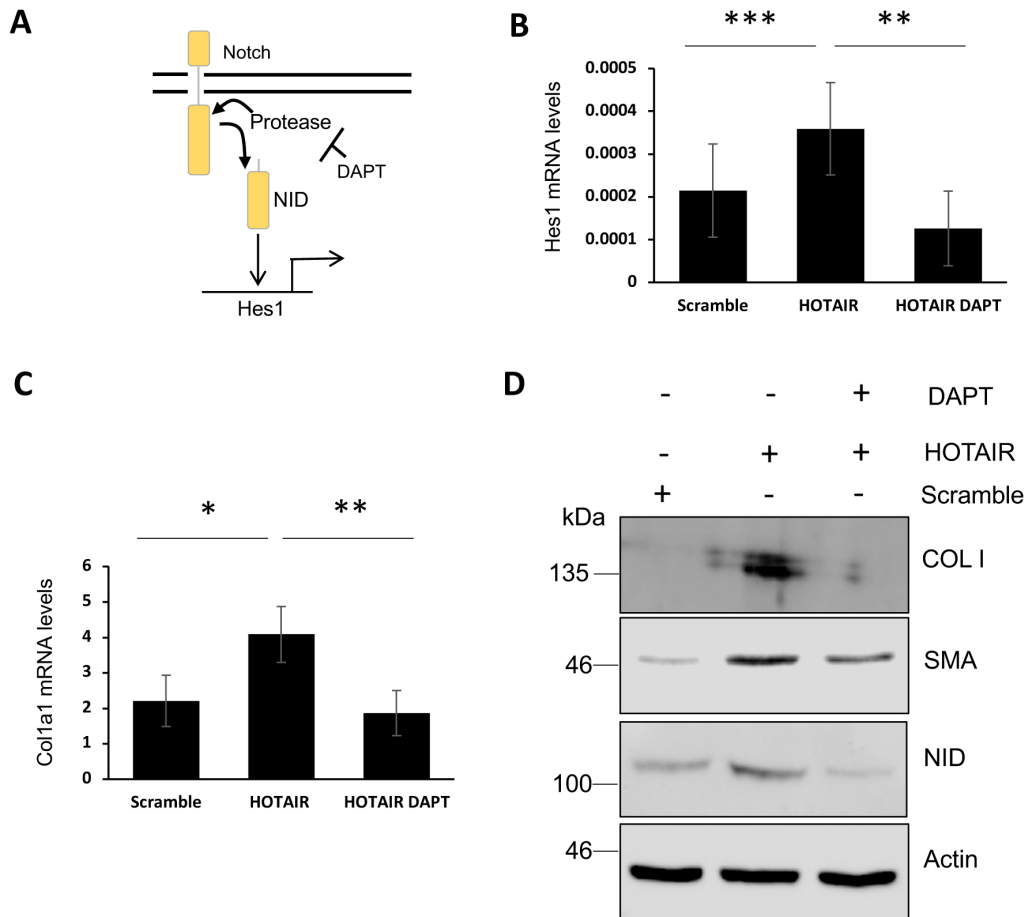

Supplement: inline-supplementary-material-4 [file inline-supplementary-material-4.pdf]

## Supplementary Figure 3

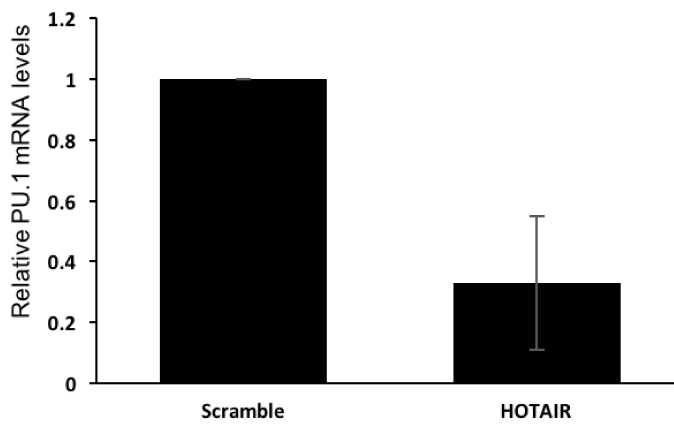

Supplement: inline-supplementary-material-5 [file inline-supplementary-material-5.pdf]
